# Supplementary material for: Study of the interaction between laevorotatory-isoleucine and a composite fluorescent probe of Pd(ii)
Source: Royal Society of Chemistry journal article supplement (doi:10.1039/c3ay42181c), 2014-01-01
Supplement: c3ay42181c1.pdf [file c3ay42181c1.pdf]

1 **SI.1** Effect of pH on the fluorescence intensity

2 [Pd<sup>2+</sup>-Acridine red]:  $6 \times 10^{-6}$  mol/L. [L-isoleucine]: 1 mg/L. [Kolthoff]: 0.7 mL.

3 [CTMAB]:  $9 \times 10^{-4}$  mol/L.

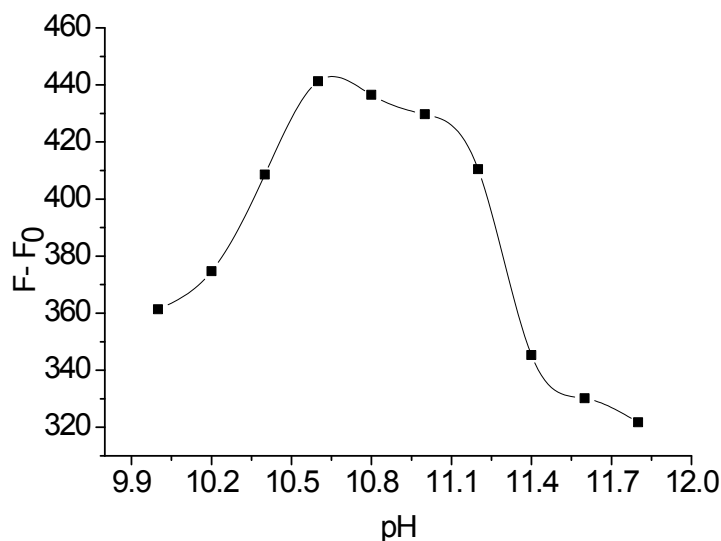

4

5

6 **SI.2** Influence of Pd<sup>2+</sup>-Acridine red concentration on the fluorescence intensity

7 pH=10.7. [L-isoleucine]: 1 mg/L. [Kolthoff]: 0.7 mL. [CTMAB]:  $9 \times 10^{-4}$  mol/L

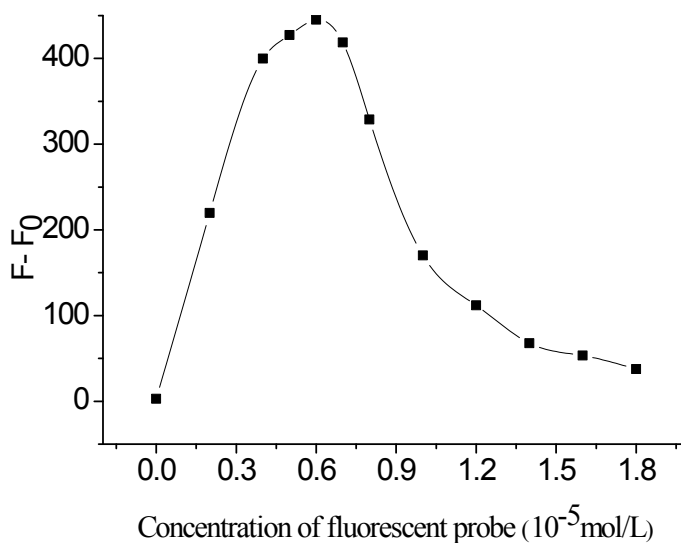

8

9

10 **SI.3** Influence of the concentration of CTMAB on the fluorescence intensity. [Pd<sup>2+</sup>-

11 Acridine red]:  $6 \times 10^{-6}$  mol/L. pH=10.7. [L-isoleucine]: 1 mg/L. [Kolthoff]: 0.7 mL.

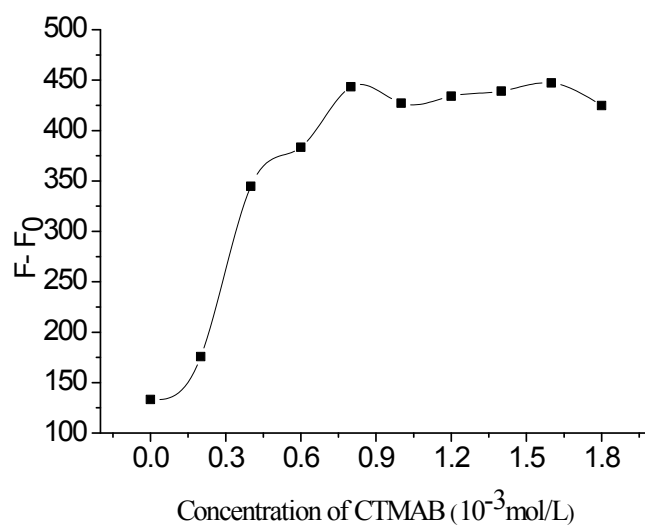

1

2

3 **SI.4** Influence of the dosage of buffer solution on the fluorescence intensity.

4 [Pd<sup>2+</sup>-Acridine red]:  $6 \times 10^{-6}$  mol/L. pH=10.7. [L-isoleucine]: 1mg/L. [CTMAB]:  $9 \times 10^{-4}$

5 mol/L.

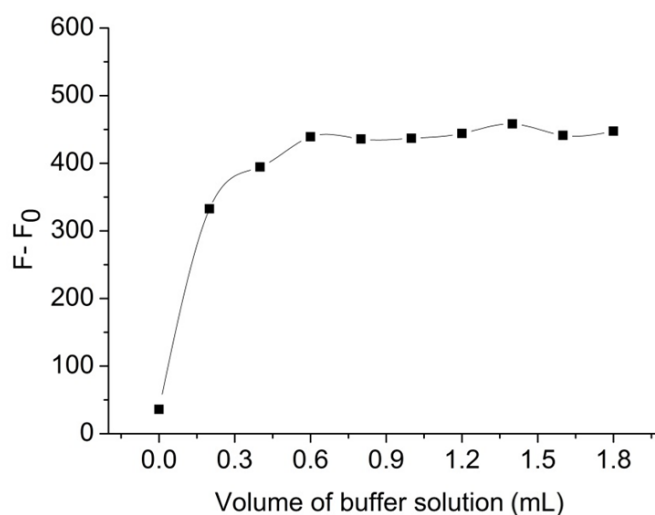

6

7

8 **SI.5** Influence of ionic intensity on the system.

9 [Pd<sup>2+</sup>-Acridine red]:  $6 \times 10^{-6}$  mol/L. pH=10.7. [L-isoleucine]: 1mg/L. [CTMAB]:  $9 \times 10^{-4}$

10 mol/L. [Kolthoff]: 0.7mL.

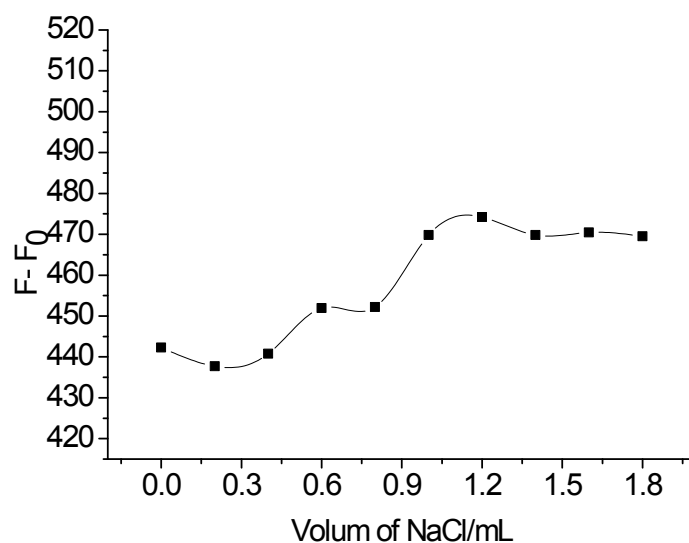

1

2

3 **SI.6** Influence of organic solvents on system

4 [Pd<sup>2+</sup>-Acridine red]: 6 × 10<sup>-6</sup> mol/L. pH=10.7. [L-isoleucine]: 1mg/L. [CTMAB]: 9 × 10<sup>-4</sup>

5 mol/L. [Koltthoff]: 0.7mL.

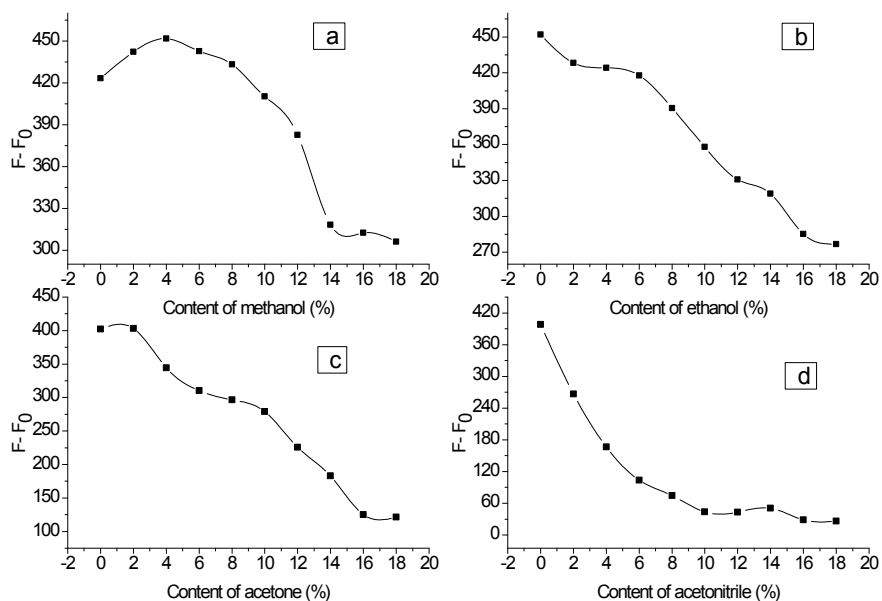

6

7 **SI.7** Job's plot for the determination of the stoichiometry of Pd<sup>2+</sup>-Acridine red and

8 Pd<sup>2+</sup>-L-isoleucine

9 SI.7a: C (Pd<sup>2+</sup>) + C (Acridine red) = 2 × 10<sup>-4</sup> mol/L      SI.7b: C (Pd<sup>2+</sup>) + C (L-isoleucine)

10 = 2 × 10<sup>-4</sup> mol/L

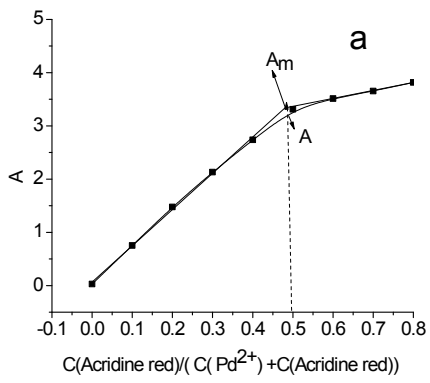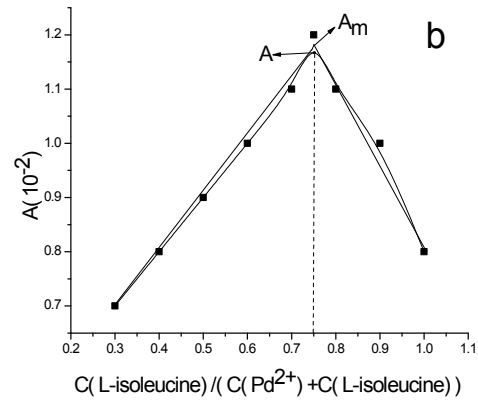

1
